# Supplementary material for: Novel triphenyltin(iv) compounds with carboxylato N-functionalized 2-quinolones as promising potential anticancer drug candidates: in vitro and in vivo evaluation
Source: Royal Society of Chemistry journal article supplement (doi:10.1039/d4dt00182f), 2024-01-01
Supplement: d4dt00182f1.pdf [file d4dt00182f1.pdf]

## **Electronic supplementary information**

### **Novel triphenyltin(IV) compounds with carboxylato *N*-functionalized 2-quinolones as promising potential anticancer drug candidates: *In vitro* and *in vivo* evaluation**

Marijana P. Kasalović,<sup>1,2</sup> Sanja Jelača,<sup>3</sup> Žiko Milanović,<sup>4</sup> Danijela Maksimović-Ivanić,<sup>3</sup> Sanja Mijatović,<sup>3</sup> Jelena Lađarević,<sup>5</sup> Bojan Božić,<sup>6</sup> Zoran Marković,<sup>4</sup> Tobias Rüffer,<sup>7</sup> Robert Kretschmer,<sup>7</sup> Goran N. Kaluđerović,<sup>\*1</sup> Nebojša Đ. Pantelić <sup>\*8</sup>

<sup>1</sup> Department of Engineering and Natural Sciences, University of Applied Sciences Merseburg, Eberhard-Leibnitz-Straße 2, 06217 Merseburg, Germany

<sup>2</sup> Department of Chemistry, Faculty of Science, University of Kragujevac, Radoja Domanovića 12, 34000 Kragujevac, Serbia

<sup>3</sup> Department of Immunology, Institute for Biological Research "Siniša Stanković" National Institute of Republic of Serbia, University of Belgrade, Bulevar despota Stefana 142, 11060 Belgrade, Serbia

<sup>4</sup> Department of Science, Institute for Information Technologies, University of Kragujevac, Jovana Cvijića bb, 34000 Kragujevac, Serbia

<sup>5</sup> Faculty of Technology and Metallurgy, University of Belgrade, Karnegijeva 4, 11000 Belgrade, Serbia

<sup>6</sup> Institute of Physiology and Biochemistry "Ivan Djaja", Faculty of Biology, University of Belgrade, Studentski trg 16, 11000 Belgrade, Serbia

<sup>7</sup> Institute of Chemistry, Chemnitz University of Technology, Straße der Nationen 62, D-09111 Chemnitz, Germany

<sup>8</sup> Department of Chemistry and Biochemistry, Faculty of Agriculture, University of Belgrade, Nemanjina 6, 11080 Belgrade, Serbia

---

Corresponding authors, E-mail addresses: [pantelic@agrif.bg.ac.rs](mailto:pantelic@agrif.bg.ac.rs) (N.Đ. Pantelić);  
[goran.kaluderovic@hs-merseburg.de](mailto:goran.kaluderovic@hs-merseburg.de) (G.N. Kaluđerović)

## TABLE OF CONTENTS OF SUPPLEMENTARY MATERIAL

This supplementary material contains:

- 1) **Table S1.** The experimental and theoretical determinate bond distances ( $\text{\AA}$ ) of the investigated compounds at the DFT/B3LYP-D3BJ/6-311+G(d,p)/ def2-TZVPD level of theory
- 2) **Table S2.** The experimental and theoretical determinate bond angle ( $^\circ$ ) of the investigated compounds at the DFT/B3LYP-D3BJ/6-311+G(d,p)/ def2-TZVPD level of theory
- 3) **Table S3.** The experimental and theoretical determinate dihedral angles ( $^\circ$ ) of the investigated compounds at the DFT/B3LYP-D3BJ/6-311+G(d,p)/ def2-TZVPD level of theory
- 4) **Table S4.** The calculated Bond Critical Points (BCP) properties at the DFT/B3LYP-D3BJ/6-311+G(d,p)/ def2-TZVPD level of theory: the electron density ( $\rho(r)$ ) and its Laplacian ( $\nabla^2\rho(r)$ ); the Lagrangian kinetic electron density ( $G(r)$ ) and the potential electron density ( $V(r)$ ); the density of the total energy of electrons ( $H(r)$ ) – Cremer-Kraka electronic energy density; the interatomic bond energy,  $E_{\text{bond}}$ .
- 5) **Table S5.** The experimental and theoretical wavelengths ( $\text{cm}^{-1}$ ) and PED (%) analysis parameters for **Ph<sub>3</sub>SnL1**
- 6) **Table S6.** The experimental and theoretical wavelengths ( $\text{cm}^{-1}$ ) and PED (%) analysis parameters for **Ph<sub>3</sub>SnL2**
- 7) **Table S7.** The experimental and theoretical wavelengths ( $\text{cm}^{-1}$ ) and PED (%) analysis parameters for **Ph<sub>3</sub>SnL3**
- 8) **Table S8.** The experimental and calculated chemical shifts (ppm) in the  $^1\text{H}$  NMR newly synthesized triphenyltin(IV) complexes
- 9) **Table S9.** The experimental and calculated chemical shifts (ppm) in the  $^{13}\text{C}$  NMR newly synthesized triphenyltin(IV) complexes
- 10) **Table S10.** Crystal data and structure refinement for **Ph<sub>3</sub>SnL1** and **Ph<sub>3</sub>SnL2**
- 11) **Figure S1.** FT-IR spectra of triphenyltin(IV) complexes
- 12) **Figure S2 – S4.**  $^1\text{H}$ ,  $^{13}\text{C}$  and  $^{119}\text{Sn}$  NMR of triphenyltin(IV) complexes
- 13) **Figure S5.** Structures of newly synthesized compounds with defined characteristics and numbered Bond Critical Points (BCP) obtained by using QTAIM analysis
- 14) **Figure S6 – S7.** Thermogravimetric analyses carried out in a non-inert atmosphere ( $\text{O}_2$ ) and an inert (Ar)
- 15) **Figure S8.** UV-Vis spectra for determination of stability of the complexes
- 16) **Figure S9.** The effect of compounds **Ph<sub>3</sub>SnL1**, **Ph<sub>3</sub>SnL2** and **Ph<sub>3</sub>SnL3** on viability of peritoneal exudate cells
- 17) **Figure S10-S11.** Cell viability
- 18) **Figure S12.** Production of ROS/RNS in A375 and B16 cells

**Table S1.** The experimental and theoretical determinate bond distances (Å) of the investigated compounds at the DFT/B3LYP-D3BJ/6-311+G(d,p)/ def2-TZVPD level of theory.

| Bond distance (Å) | Ph <sub>3</sub> SnL1 |              | Bond distance (Å) | Ph <sub>3</sub> SnL2 |              | Ph <sub>3</sub> SnL3 |
|-------------------|----------------------|--------------|-------------------|----------------------|--------------|----------------------|
|                   | exp                  | theor        |                   | exp                  | theor        | theor                |
| N1-C2             | 1.377                | 1.404        | N1-C2             | 1.368                | 1.404        | 1.410                |
| C2-C3             | 1.435                | 1.450        | C2-C3             | 1.435                | 1.454        | 1.448                |
| C2-O3             | 1.264                | 1.236        | C2-O3             | 1.259                | 1.234        | 1.224                |
| C3-C4             | 1.435                | 1.357        | C3-C4             | 1.354                | 1.358        | 1.359                |
| C5-C6             | 1.409                | 1.409        | C5-C6             | 1.371                | 1.387        | 1.387                |
| C6-C7             | 1.374                | 1.386        | C6-C7             | 1.392                | 1.400        | 1.402                |
| C8-C9             | 1.379                | 1.388        | C8-C9             | 1.402                | 1.409        | 1.409                |
| C9-C10            | 1.406                | 1.409        | C9-C10            | 1.411                | 1.421        | 1.418                |
| C10-N1            | 1.403                | 1.399        | C9-N1             | 1.396                | 1.394        | 1.392                |
| C4-C5             | 1.448                | 1.450        | C10-C4            | 1.440                | 1.450        | 1.443                |
| C4-C14            | 1.505                | 1.505        | C4-C13            | 1.497                | 1.505        | 1.361                |
| C10-C5            | 1.410                | 1.409        | C10-C5            | 1.414                | 1.409        | 1.407                |
| C7-C8             | 1.383                | 1.399        | N1-C12            | 1.462                | 1.458        | 1.457                |
| C12-C11           | 1.502                | 1.510        | C12-C11           | 1.529                | 1.529        | 1.528                |
| C11-O1            | 1.300                | 1.316        | C11-O1            | 1.289                | 1.312        | 1.311                |
| C11-O2            | 1.226                | 1.235        | C11-O2            | 1.224                | 1.228        | 1.229                |
| O1-Sn1            | 2.139                | 2.090        | O1-Sn1            | 2.137                | 2.057        | 2.061                |
| Sn1-C15           | 2.138                | 2.132        | Sn1-C14           | 2.138                | 2.127        | 2.137                |
| C15-C16           | 1.399                | 1.403        | C14-C15           | 1.390                | 1.404        | 1.404                |
| C16-C17           | 1.389                | 1.397        | C15-C16           | 1.391                | 1.397        | 1.397                |
| C17-C18           | 1.386                | 1.398        | C16-C17           | 1.384                | 1.398        | 1.399                |
| C18-C19           | 1.386                | 1.398        | C17-C18           | 1.383                | 1.397        | 1.397                |
| C19-C20           | 1.390                | 1.403        | C18-C19           | 1.390                | 1.398        | 1.398                |
| C20-C15           | 1.395                | 1.403        | C19-C14           | 1.393                | 1.403        | 1.403                |
| Sn1-C21           | 2.128                | 2.138        | Sn1-C20           | 2.115                | 2.135        | 2.127                |
| C21-C22           | 1.395                | 1.403        | C20-C21           | 1.394                | 1.403        | 1.403                |
| C22-C23           | 1.387                | 1.398        | C21-C22           | 1.386                | 1.398        | 1.397                |
| C23-C24           | 1.391                | 1.398        | C22-C23           | 1.377                | 1.399        | 1.398                |
| C24-C25           | 1.377                | 1.398        | C23-C24           | 1.378                | 1.397        | 1.397                |
| C25-C26           | 1.386                | 1.397        | C24-C25           | 1.389                | 1.398        | 1.398                |
| C26-C21           | 1.398                | 1.404        | C25-C20           | 1.392                | 1.403        | 1.403                |
| Sn1-C27           | 2.144                | 2.145        | Sn1-C20           | 2.115                | 2.135        | 2.134                |
| C27-C28           | 1.400                | 1.404        | C26-C27           | 1.392                | 1.404        | 1.404                |
| C28-C29           | 1.394                | 1.398        | C27-C28           | 1.393                | 1.399        | 1.399                |
| C29-C30           | 1.392                | 1.398        | C28-C29           | 1.388                | 1.398        | 1.398                |
| C30-C31           | 1.381                | 1.397        | C29-C30           | 1.383                | 1.398        | 1.398                |
| C31-C32           | 1.394                | 1.398        | C30-C31           | 1.388                | 1.397        | 1.397                |
| C32-C27           | 1.389                | 1.404        | C31-C26           | 1.390                | 1.404        | 1.404                |
| <b>MAE</b>        | -                    | <b>0.112</b> | <b>MAE</b>        | -                    | <b>0.014</b> | -                    |
| <b>R</b>          | -                    | <b>0.997</b> | <b>R</b>          | -                    | <b>0.997</b> | -                    |

**Table S2.** The experimental and theoretical determinate bond angle (°) of the investigated compounds at the DFT/B3LYP-D3BJ/6-311+G(d,p)/ def2-TZVPD level of theory.

| Bond angle (°) | Ph <sub>3</sub> SnL1 |              | Bond angle (°) | Ph <sub>3</sub> SnL2 |              | Ph <sub>3</sub> SnL3 |
|----------------|----------------------|--------------|----------------|----------------------|--------------|----------------------|
|                | exp                  | theor        |                | exp                  | theor        | theor                |
| N1-C2-O3       | 118.6                | 120.2        | N1-C2-O3       | 119.8                | 121.0        | 120.7                |
| N1-C2-C3       | 117.5                | 116.5        | N1-C2-C3       | 117.3                | 115.8        | 116.0                |
| C2-C3-C4       | 122.5                | 123.2        | C2-C3-C4       | 122.7                | 123.4        | 121.9                |
| C3-C4-C14      | 121.3                | 120.7        | C3-C4-C13/OH   | 120.7                | 120.8        | 123.4                |
| C4-C5-C6       | 123.0                | 121.6        | C4-C10-C5      | 122.4                | 122.4        | 122.3                |
| C6-C7-C8       | 120.2                | 119.0        | C5-C6-C7       | 120.3                | 119.3        | 119.3                |
| C7-C8-C9       | 120.6                | 120.8        | C6-C7-C8       | 120.6                | 120.6        | 121.0                |
| C8-C9-C10      | 120.1                | 120.9        | C8-C9-N1       | 120.8                | 120.8        | 121.3                |
| C9-C10-N1      | 120.8                | 122.1        | C8-C9-C10      | 119.9                | 119.3        | 118.5                |
| N1-C13-C12     | 108.0                | 113.0        | N1-C12-C11     | 114.3                | 111.2        | 111.8                |
| C12-C11-O1     | 116.0                | 115.5        | C12-C11-O1     | 115.3                | 113.1        | 113.7                |
| O1-C11-O2      | 123.7                | 121.3        | O1-C11-O2      | 126.8                | 124.5        | 124.3                |
| C11-O1-Sn1     | 111.8                | 107.9        | C11-O1-Sn1     | 124.8                | 117.4        | 115.9                |
| O1 -Sn1-C15    | 88.0                 | 95.9         | O1 -Sn1-C14    | 95.4                 | 107.8        | 105.6                |
| O1 -Sn1-C21    | 92.4                 | 110.2        | O1-Sn1-C20     | 97.7                 | 106.5        | 108.5                |
| O1 -Sn1-C27    | 101.3                | 110.0        | O1 -Sn1-C26    | 89.9                 | 95.8         | 96.1                 |
| C15-Sn1-C21    | 114.7                | 109.2        | C14-Sn1-C20    | 122.4                | 119.1        | 120.1                |
| C15-Sn1-C27    | 112.9                | 110.4        | C14-Sn1-C26    | 115.4                | 115.3        | 107.8                |
| C21-Sn1-C27    | 130.5                | 118.7        | C20-Sn1-C26    | 120.4                | 109.2        | 115.6                |
| Sn1-C15-C16    | 121.9                | 122.2        | Sn1-C14-C15    | 120.1                | 123.1        | 123.6                |
| Sn1-C15-C20    | 118.0                | 118.5        | Sn1-C14-C19    | 121.5                | 117.6        | 117.3                |
| C15-C16-C17    | 120.9                | 120.2        | C14-C15-C16    | 121.1                | 120.2        | 120.2                |
| C16-C17-C18    | 120.1                | 119.8        | C15-C16-C17    | 119.9                | 120.2        | 120.3                |
| C17-C18-C19    | 119.7                | 119.9        | C16-C17-C18    | 119.8                | 119.9        | 119.8                |
| C18-C19-C20    | 120.0                | 120.4        | C17-C18-C19    | 119.9                | 119.9        | 120.0                |
| C19-C20-C15    | 121.0                | 119.4        | C18-C19-C14    | 121.1                | 120.5        | 120.5                |
| Sn1-C21-C22    | 123.1                | 122.1        | Sn1-C20-C21    | 121.4                | 121.1        | 121.0                |
| Sn1-C21-C26    | 119.1                | 118.5        | Sn1-C20-C25    | 119.8                | 119.4        | 119.5                |
| C21-C22-C23    | 120.8                | 120.2        | C20-C21-C22    | 120.4                | 120.0        | 120.1                |
| C22-C23-C24    | 120.3                | 120.3        | C21-C22-C23    | 120.3                | 120.2        | 120.2                |
| C23-C24-C25    | 119.5                | 119.8        | C22-C23-C24    | 120.1                | 120.0        | 120.0                |
| C24-C25-C26    | 120.1                | 119.7        | C23-C24-C25    | 119.9                | 119.9        | 119.9                |
| C25-C26-C21    | 121.3                | 119.1        | C24-C25-C20    | 120.6                | 120.3        | 120.3                |
| Sn1-C27-C28    | 118.3                | 118.0        | Sn1-C26-C27    | 121.1                | 122.2        | 122.5                |
| Sn1-C27-C32    | 123.4                | 122.8        | Sn1-C26-C31    | 120.4                | 118.7        | 118.4                |
| C27-C28-C29    | 120.7                | 120.6        | C26-C27-C28    | 120.9                | 120.6        | 120.6                |
| C28-C29-C30    | 120.3                | 120.0        | C27-C28-C29    | 120.1                | 120.0        | 120.0                |
| C29-C30-C31    | 119.0                | 119.8        | C28-C29-C30    | 119.4                | 119.9        | 119.9                |
| C30-C31-C32    | 120.7                | 120.3        | C29-C30-C31    | 120.4                | 120.2        | 120.1                |
| C31-C32-C27    | 120.8                | 120.2        | C30-C31-C26    | 121.0                | 120.4        | 120.5                |
| <b>MAE</b>     | -                    | 2.170        | <b>MAE</b>     | -                    | 1.918        | -                    |
| <b>R</b>       | -                    | <b>0.868</b> | <b>R</b>       | -                    | <b>0.881</b> | -                    |

**Table S3.** The experimental and theoretical determinate dihedral angles ( $^{\circ}$ ) of the investigated compounds at the DFT/B3LYP-D3BJ/6-311+G(d,p)/ def2-TZVPD level of theory.

| Dihedral angles ( $^{\circ}$ ) | Ph <sub>3</sub> SnL1 |              | Dihedral angles ( $^{\circ}$ ) | Ph <sub>3</sub> SnL2 |              | Ph <sub>3</sub> SnL3 |
|--------------------------------|----------------------|--------------|--------------------------------|----------------------|--------------|----------------------|
|                                | exp                  | theor        |                                | exp                  | theor        | theor                |
| N1-C2-C3-C4                    | 0.6                  | 2.2          | N1-C2-C3-C4                    | 1.2                  | 2.4          | 2.6                  |
| C2-C3-C4-C14                   | 179.1                | 178.4        | C2-C3-C4-C14                   | 174.5                | 177.8        | 177.8                |
| C2-C3-C4-C5                    | 0.1                  | 1.3          | C2-C3-C4-C10                   | -3.5                 | -1.7         | -1.8                 |
| C3-C4-C5-C6                    | 179.1                | 179.7        | C3-C4-C10-C5                   | -178.0               | -179.1       | -178.8               |
| C3-C4-C5-C10                   | 0.2                  | 0.6          | C3-C4-C10-C9                   | 3.0                  | 0.0          | 0.0                  |
| C4-C5-C6-C7                    | 179.3                | 179.2        | C4-C10-C5-C6                   | -179.0               | -178.8       | -178.5               |
| C5-C6-C7-C8                    | -0.6                 | -0.7         | C10-C5-C6-C7                   | -0.2                 | -0.5         | -0.7                 |
| C6-C7-C8-C9                    | 1.8                  | 1.0          | C5-C6-C7-C8                    | 0.3                  | 0.1          | 0.2                  |
| C7-C8-C9-C10                   | -1.0                 | -0.1         | C6-C7-C8-C9                    | -0.4                 | -0.4         | -0.7                 |
| C8-C9-C10-C5                   | -1.1                 | -1.2         | C7-C8-C9-C10                   | 0.2                  | 0.6          | -1.6                 |
| N1-C13-C12-C11                 | 156.7                | 50.8         | N1-C12-C11-O1                  | -11.5                | -28.9        | -26.0                |
| C12-C11-O1-Sn1                 | 164.4                | 166.7        | C12-C11-O1-Sn1                 | 169.0                | 157.3        | 160.4                |
| C11-O1-Sn1-C15                 | -172.2               | -174.4       | C11-O1-Sn1-C14                 | 81.7                 | 79.0         | -53.4                |
| C11-O1-Sn1-C21                 | -57.4                | -72.7        | C11-O1-Sn1-C20                 | -42.1                | -49.8        | 76.7                 |
| C11-O1-Sn1-C27                 | 74.8                 | 60.7         | C11-O1-Sn1-C26                 | -162.8               | -160         | -163.7               |
| O1-Sn1-C15-C16                 | 101.4                | 173.0        | O1-Sn1-C14-C15                 | -17.7                | -62.3        | 66.6                 |
| O1-Sn1-C15-C20                 | -75.5                | 6.6          | O1-Sn1-C14-C19                 | 155.6                | 117.6        | -112.3               |
| Sn1-C15-C16-C17                | -177.1               | -178.7       | Sn1-C14-C15-C16                | 172.8                | 179.3        | 178.6                |
| C15-C16-C17-C18                | -1.1                 | 0.3          | C14-C15-C16-C17                | 0.4                  | 0.1          | 0.5                  |
| C16-C17-C18-C19                | 0.5                  | 0.4          | C15-C16-C17-C18                | 0.2                  | 0.4          | 0.2                  |
| C17-C18-C19-C20                | 1.4                  | 0.5          | C16-C17-C18-C19                | -0.7                 | 0.2          | -0.2                 |
| C18-C19-C20-C15                | -2.6                 | 0.0          | C17-C18-C19-C14                | 0.4                  | 0.2          | 0.4                  |
| C19-C20-C15-Sn1                | 179.0                | 178.8        | C18-C19-C14-Sn1                | -173.1               | -179.1       | -179.1               |
| O1-Sn1-C21-C22                 | 126.5                | 72.7         | O1-Sn1-C20-C21                 | 87.4                 | 67.3         | -69.3                |
| O1-Sn1-C21-C26                 | -54.6                | -109.3       | O1-Sn1-C20-C25                 | -96.5                | -112.5       | 111.3                |
| Sn1-C21-C22-C23                | 177.8                | 177.9        | Sn1-C20-C21-C22                | 175.0                | 179.6        | 179.3                |
| C21-C22-C23-C24                | -0.5                 | 0.0          | C20-C21-C22-C23                | 0.9                  | 0.5          | 0.1                  |
| C22-C23-C24-C25                | 1.3                  | 0.1          | C21-C22-C23-C24                | 0.1                  | 0.4          | 0.3                  |
| C23-C24-C25-C26                | -0.7                 | -0.2         | C22-C23-C24-C25                | -0.9                 | -0.1         | 0.2                  |
| C24-C25-C26-C21                | -0.9                 | 0.1          | C23-C24-C25-C20                | 0.8                  | 0.4          | 0.1                  |
| C25-C26-C21-Sn1                | -177.2               | -177.9       | C24-C25-C20-Sn1                | -175.9               | -179.8       | -179.2               |
| O1-Sn1-C27-C28                 | 114.3                | 120.4        | O1-Sn1-C26-C27                 | -137.7               | -174.7       | -165.8               |
| O1-Sn1-C27-C32                 | -63.7                | -63.2        | O1-Sn1-C26-C31                 | 36.5                 | 7.9          | 18.7                 |
| Sn1-C27-C28-C29                | -177.2               | 175.5        | Sn1-C26-C27-C28                | 174.0                | 177.5        | 175.7                |
| C27-C28-C29-C30                | -2.3                 | 0.7          | C26-C27-C28-C29                | 0.5                  | 0.1          | 0.4                  |
| C28-C29-C30-C31                | 1.2                  | 1.2          | C27-C28-C29-C30                | 0.6                  | 0.1          | 0.1                  |
| C29-C30-C31-C32                | 1.3                  | 0.5          | C28-C29-C30-C31                | -1.1                 | 0.1          | 0.1                  |
| C30-C31-C32-C27                | -2.7                 | -1.2         | C29-C30-C31-C26                | 0.6                  | 0.2          | 0.2                  |
| C31-C32-C27-Sn1                | 179.5                | 176.0        | C30-C31-C26-Sn1                | -173.8               | -177.7       | -175.6               |
| <b>MAE</b>                     | -                    | 11.226       | <b>MAE</b>                     | -                    | 0.699        | -                    |
| <b>R</b>                       | -                    | <b>0.965</b> | <b>R</b>                       | -                    | <b>0.993</b> | -                    |

**Table S4.** The calculated Bond Critical Points (BCP) properties at the DFT/B3LYP-D3BJ/6-311+G(d,p)/ def2-TZVPD level of theory: the electron density ( $\rho(r)$ ) and its Laplacian ( $\nabla^2\rho(r)$ ); the Lagrangian kinetic electron density ( $G(r)$ ) and the potential electron density ( $V(r)$ ); the density of the total energy of electrons ( $H(r)$ ) – Cremer-Kraka electronic energy density; the interatomic bond energy,  $E_{\text{bond}}$ .

| Critical points           | $\rho(r)$<br>(a.u) | $\nabla^2\rho(r)$<br>(a.u) | $G(r)$<br>(kJ mol <sup>-1</sup> ) | $V(r)$<br>(kJ mol <sup>-1</sup> ) | $H(r)$<br>(kJ mol <sup>-1</sup> ) | $-(G(r))/(V(r))$ | $E_{\text{bond}}$<br>(kJ mol <sup>-1</sup> ) |
|---------------------------|--------------------|----------------------------|-----------------------------------|-----------------------------------|-----------------------------------|------------------|----------------------------------------------|
| <b>Ph<sub>3</sub>SnL1</b> |                    |                            |                                   |                                   |                                   |                  |                                              |
| BCP-1                     | 0.109              | 0.106                      | 195.1                             | -320.7                            | -125.6                            | 0.61             | -160.4                                       |
| BCP-2                     | 0.108              | 0.119                      | 200.9                             | -323.8                            | -122.9                            | 0.62             | -161.9                                       |
| BCP-3                     | 0.111              | 0.109                      | 199.6                             | -327.5                            | -127.9                            | 0.61             | -163.8                                       |
| BCP-4                     | 0.090              | 0.359                      | 278.0                             | -320.4                            | -42.4                             | 0.87             | -160.2                                       |
| BCP-1'                    | 0.013              | 0.048                      | 28.4                              | -25.6                             | 2.9                               | 1.11             | -12.8                                        |
| BCP-2'                    | 0.010              | 0.035                      | 19.9                              | -16.8                             | 3.1                               | 1.18             | -8.4                                         |
| <b>Ph<sub>3</sub>SnL2</b> |                    |                            |                                   |                                   |                                   |                  |                                              |
| BCP-1                     | 0.112              | 0.109                      | 202.1                             | -332.7                            | -130.6                            | 0.61             | -166.4                                       |
| BCP-2                     | 0.110              | 0.114                      | 202.7                             | -330.3                            | -127.7                            | 0.61             | -165.2                                       |
| BCP-3                     | 0.110              | 0.110                      | 198.7                             | -325.3                            | -126.6                            | 0.61             | -162.6                                       |
| BCP-4                     | 0.095              | 0.403                      | 310.4                             | -356.1                            | -45.7                             | 0.87             | -178.0                                       |
| BCP-1'                    | 0.010              | 0.035                      | 20.4                              | -17.5                             | 2.9                               | 1.17             | -8.8                                         |
| BCP-2'                    | 0.008              | 0.027                      | 15.6                              | -13.2                             | 2.4                               | 1.19             | -6.6                                         |
| <b>Ph<sub>3</sub>SnL3</b> |                    |                            |                                   |                                   |                                   |                  |                                              |
| BCP-1                     | 0.112              | 0.109                      | 201.6                             | -332.0                            | -130.4                            | 0.61             | -166.0                                       |
| BCP-2                     | 0.110              | 0.110                      | 197.7                             | -323.5                            | -125.7                            | 0.61             | -161.7                                       |
| BCP-3                     | 0.110              | 0.115                      | 203.5                             | -331.5                            | -128.0                            | 0.61             | -165.7                                       |
| BCP-4                     | 0.094              | 0.398                      | 306.1                             | -351.2                            | -45.1                             | 0.87             | -175.6                                       |
| BCP-1'                    | 0.007              | 0.026                      | 14.6                              | -12.0                             | 2.6                               | 1.22             | -6.0                                         |
| BCP-2'                    | 0.011              | 0.039                      | 22.5                              | -19.6                             | 2.9                               | 1.15             | -9.8                                         |

**Table S5.** The experimental and theoretical wavenumbers ( $\text{cm}^{-1}$ ) and PED (%) analysis parameters for **Ph<sub>3</sub>SnL1**.

| Assignments of<br>Ph <sub>3</sub> SnL1                                           | Exp. values                | B3LYP-D3BJ/6-311++g(d,p)/def2-TZVPD |                                                                                     |
|----------------------------------------------------------------------------------|----------------------------|-------------------------------------|-------------------------------------------------------------------------------------|
|                                                                                  | IR<br>( $\text{cm}^{-1}$ ) | Calculated<br>( $\text{cm}^{-1}$ )  | PED (%) of Ph <sub>3</sub> SnL1                                                     |
| C-H stretching (Ph)/<br>C-H stretching (-CH <sub>3</sub> )                       | 3046                       | 3131                                | $\nu_{\text{CH}}$ (99)                                                              |
| C-H stretching (-CH <sub>2</sub> -)                                              | 2988                       | 2976                                | $\nu_{\text{HC}}$ (99)                                                              |
| C=O3 stretching/<br>C-H stretching (-CH <sub>2</sub> -)                          | 1640                       | 1688                                | $\nu_{\text{C=O3}}$ (63) + $\nu_{\text{CC}}$ (11)                                   |
| C=O2 stretching                                                                  | 1553                       | 1614                                | $\nu_{\text{C=O1}}$ (84)                                                            |
| H-C-H bending (quinoline ring)<br>C-C-H bending (quinoline ring)                 | 1429                       | 1455                                | $\delta_{\text{HCH}}$ (40) + $\delta_{\text{CCH}}$ (20)                             |
| C=O1 stretching/<br>C-C stretching                                               | 1333                       | 1305                                | $\nu_{\text{C=O2}}$ (40) + $\nu_{\text{C-C}}$ (18)                                  |
| H-C-C bending/<br>C-C-H bending/<br>C-C stretching (Ph)                          | 1077                       | 1073                                | $\delta_{\text{HCH}}$ (30) + $\delta_{\text{CCH}}$ (20) +<br>$\nu_{\text{HC}}$ (10) |
| C-C-H bending/<br>H-C-C-H torsion (w.t) (Ph)                                     | 998                        | 945                                 | $\delta_{\text{CCH}}$ (31) + $\tau_{\text{HCCH}}$ (10)                              |
| H-C-C-H torsion (w.t) (Ph)/<br>C-C-C-H torsion (w.t) (Ph)                        | 730                        | 730                                 | $\tau_{\text{HCCH}}$ (21) + $\tau_{\text{CCCH}}$ (17)                               |
| N-C-C-H torsion (w.t) (quinoline ring)<br>C-N-C-O torsion (w.t) (quinoline ring) | 697                        | 698                                 | $\tau_{\text{NCCH}}$ (12) + $\tau_{\text{CNCO}}$ (19)                               |
| Sn-O1 stretching/<br>O-C-C bending (quinoline ring)                              | 452                        | 450                                 | $\nu_{\text{Sn-O2}}$ (21) + $\delta_{\text{OCC}}$ (30)                              |
| C-Sn stretching/<br>C-C-C bending                                                | 274                        | 270                                 | $\nu_{\text{C-Sn}}$ (43) + $\delta_{\text{CCC}}$ (10)                               |

**Table S6.** The experimental and theoretical wavenumbers ( $\text{cm}^{-1}$ ) and PED (%) analysis parameters for **Ph<sub>3</sub>SnL2**.

| Assignments of<br>Ph <sub>3</sub> SnL2                                              | Exp. values                | B3LYP-D3BJ/6-311++g(d,p)/def2-TZVPD |                                                         |
|-------------------------------------------------------------------------------------|----------------------------|-------------------------------------|---------------------------------------------------------|
|                                                                                     | IR<br>( $\text{cm}^{-1}$ ) | Calculated<br>( $\text{cm}^{-1}$ )  | PED (%) of Ph <sub>3</sub> SnL2                         |
| C-H stretching (Ph)/<br>C-H stretching (-CH <sub>3</sub> )                          | 3045                       | 3143                                | $\nu_{\text{CH}}$ (99)                                  |
| C-H stretching (-CH <sub>2</sub> -)                                                 | 2989                       | 3043                                | $\nu_{\text{HC}}$ (91)                                  |
| C=O3 stretching                                                                     | 1660                       | 1699                                | $\nu_{\text{C=O3}}$ (95)                                |
| C=O2 stretching                                                                     | 1559                       | 1619                                | $\nu_{\text{C=O1}}$ (80)                                |
| H-C-H bending (quinoline ring, -CH <sub>3</sub> )<br>C-C-H bending (quinoline ring) | 1428                       | 1463                                | $\delta_{\text{HCH}}$ (38) + $\delta_{\text{CCH}}$ (20) |
| C=O1 stretching/<br>C-C stretching                                                  | 1305                       | 1327                                | $\nu_{\text{C=O1}}$ (31) + $\nu_{\text{CC}}$ (14)       |
| C-C-H bending/<br>H-C-C-H torsion (w.t) (Ph)                                        | 1077                       | 1080                                | $\delta_{\text{CCH}}$ (60) + $\tau_{\text{HCCH}}$ (11)  |
| C-C-C-H torsion (w.t) (Ph)<br>H-C-C-C torsion (w.t) (Ph)                            | 730                        | 730                                 | $\tau_{\text{HCCH}}$ (20) + $\tau_{\text{HCCC}}$ (28)   |
| Sn-O1 stretching/<br>N-C-C bending (quinoline ring)                                 | 455                        | 452                                 | $\nu_{\text{Sn-O2}}$ (16) + $\delta_{\text{NCC}}$ (18)  |
| C-Sn stretching/<br>Sn-C-C bending                                                  | 277                        | 276                                 | $\nu_{\text{C-Sn}}$ (50) + $\delta_{\text{CCC}}$ (6)    |

**Table S7.** The experimental and theoretical wavenumbers ( $\text{cm}^{-1}$ ) and PED (%) analysis parameters for **Ph<sub>3</sub>SnL3**.

| Assignments of Ph <sub>3</sub> SnL3                            | Exp. values             | B3LYP-D3BJ/6-311++g(d,p)/def2-TZVPD |                                                        |
|----------------------------------------------------------------|-------------------------|-------------------------------------|--------------------------------------------------------|
|                                                                | IR ( $\text{cm}^{-1}$ ) | Calculated ( $\text{cm}^{-1}$ )     | PED (%) of Ph <sub>3</sub> SnL3                        |
| O-H stretching                                                 | 3719                    | 3744                                | $\nu_{\text{OH}}$ (100)                                |
| C-H stretching (Ph)/<br>C-H stretching (-CH <sub>3</sub> )     | 3045                    | 3142                                | $\nu_{\text{CH}}$ (99)                                 |
| C-H stretching (-CH <sub>2</sub> -)                            | 2990                    | 3031                                | $\nu_{\text{CH}}$ (99)                                 |
| C=O3 stretching                                                | 1638                    | 1695                                | $\nu_{\text{C=O2}}$ (70)                               |
| C=O2 stretching                                                | 1556                    | 1513                                | $\nu_{\text{C=O1}}$ (85)                               |
| C-C-H bending (quinoline ring)                                 | 1428                    | 1438                                | $\delta_{\text{CCH}}$ (80)                             |
| C=O1 stretching/<br>C-C stretching                             | 1334                    | 1331                                | $\nu_{\text{C=O2}}$ (35) + $\nu_{\text{C-C}}$ (11)     |
| C-C-H bending/<br>C-C stretching (Ph)                          | 1076                    | 1075                                | $\delta_{\text{CCH}}$ (25) + $\nu_{\text{CC}}$ (15)    |
| CCCH torsion (w.t) (Ph)<br>HCCH torsion (w.t) (Ph)             | 729                     | 730                                 | $\tau_{\text{HCCH}}$ (40) + $\tau_{\text{CCCH}}$ (28)  |
| NCCH torsion (w.t) (quinoline ring)<br>CNCO torsion (w.t) (Ph) | 695                     | 697                                 | $\tau_{\text{NCCH}}$ (10) + $\tau_{\text{CNCO}}$ (8)   |
| Sn-O1 stretching/<br>N-C-C bending (quinoline ring)            | 452                     | 451                                 | $\nu_{\text{Sn-O2}}$ (30) + $\delta_{\text{NCC}}$ (10) |
| C-Sn stretching/<br>Sn-C-C bending                             | 273                     | 273                                 | $\nu_{\text{C-Sn}}$ (26) + $\delta_{\text{SnCC}}$ (10) |

**Table S8.** The experimental and calculated chemical shifts (ppm) in the <sup>1</sup>H NMR spectra of triphenyltin(IV) complexes.

| Atoms                                        | Ph <sub>3</sub> SnL1,<br>$\delta$ (ppm) |        | Ph <sub>3</sub> SnL2,<br>$\delta$ (ppm) |        | Ph <sub>3</sub> SnL3,<br>$\delta$ (ppm) |                                                |                                               |
|----------------------------------------------|-----------------------------------------|--------|-----------------------------------------|--------|-----------------------------------------|------------------------------------------------|-----------------------------------------------|
|                                              | Exp.                                    | Theor. | Exp.                                    | Theor. | Exp.                                    | Theor.                                         |                                               |
|                                              |                                         |        |                                         |        |                                         | <sup>IV</sup> Ph <sub>3</sub> SnL <sub>3</sub> | <sup>V</sup> Ph <sub>3</sub> SnL <sub>3</sub> |
| -CH <sub>3</sub> /OH (C-H <sup>14/13</sup> ) | 2.44                                    | 2.00   | 2.43                                    | 2.63   |                                         | -                                              | -                                             |
| C-H <sup>12</sup>                            | 2.84                                    | 3.26   | 5.12                                    | 5.21   | 4.8                                     | 5.10                                           | 4.84                                          |
| C-H <sup>13</sup>                            | 4.61                                    | 4.54   | -                                       | -      | -                                       | -                                              | -                                             |
| C-H <sup>3</sup>                             | 6.54                                    | 6.64   | 6.51                                    | 6.94   | 5.74                                    | 5.86                                           | 5.65                                          |
| C-H <sup>7</sup>                             | 7.21                                    | 6.39   | 7.19                                    | 6.01   | 7.22                                    | 6.28                                           | 6.33                                          |
| C-H <sup>8</sup>                             | 7.42                                    | 7.91   | 6.92                                    | 6.88   | 7.22                                    | 6.84                                           | 6.58                                          |
| C-H <sup>p</sup>                             | 7.46                                    | 7.72   | 7.40                                    | 7.74   | 7.36                                    | 7.88                                           | 7.80                                          |
| C-H <sup>m</sup>                             | 7.46                                    | 7.65   | 7.40                                    | 7.77   | 7.36                                    | 7.44                                           | 7.75                                          |
| C-H <sup>6</sup>                             | 7.68                                    | 6.81   | 7.25                                    | 6.91   | 6.92                                    | 7.33                                           | 7.42                                          |
| C-H <sup>o</sup>                             | 7.73                                    | 7.89   | 7.63                                    | 7.75   | 7.67                                    | 7.51                                           | 7.60                                          |
| C-H <sup>5</sup>                             | 7.79                                    | 6.84   | 7.68                                    | 7.63   | 8.01                                    | 8.41                                           | 8.39                                          |
| MAE                                          | 0.43                                    |        | 0.32                                    |        | 0.34                                    |                                                | 0.39                                          |
| R                                            | 0.965                                   |        | 0.958                                   |        | 0.897                                   |                                                | 0.905                                         |



**Table S9.** The experimental and calculated chemical shifts (ppm) in the  $^{13}\text{C}$  NMR spectra of triphenyltin(IV) complexes.

| Atoms                           | $\text{Ph}_3\text{SnL}_1$ ,<br>$\delta$ (ppm) |        | $\text{Ph}_3\text{SnL}_2$ ,<br>$\delta$ (ppm) |        | $\text{Ph}_3\text{SnL}_3$ ,<br>$\delta$ (ppm) |                                       |                                      |
|---------------------------------|-----------------------------------------------|--------|-----------------------------------------------|--------|-----------------------------------------------|---------------------------------------|--------------------------------------|
|                                 | Exp.                                          | Theor. | Exp.                                          | Theor. | Exp.                                          | Theor.                                |                                      |
|                                 |                                               |        |                                               |        |                                               | $^{\text{IV}}\text{Ph}_3\text{SnL}_3$ | $^{\text{V}}\text{Ph}_3\text{SnL}_3$ |
| <b>-CH<sub>3</sub> (C14/13)</b> | 18.3                                          | 21.0   | 18.5                                          | 22.0   | –                                             | –                                     | –                                    |
| <b>C12</b>                      | 31.6                                          | 35.2   | 43.4                                          | 48.0   | 43.2                                          | 48.5                                  | 48.0                                 |
| <b>C13</b>                      | 38.0                                          | 43.0   | –                                             | –      | –                                             | –                                     | –                                    |
| <b>C8</b>                       | 113.7                                         | 114.2  | 113.9                                         | 109.7  | 113.6                                         | 112.6                                 | 112.4                                |
| <b>C3</b>                       | 120.4                                         | 119.6  | 120.0                                         | 118.3  | 94.1                                          | 95.8                                  | 96.9                                 |
| <b>C10</b>                      | 121.1                                         | 116.6  | 120.9                                         | 120.3  | 116.1                                         | 113.8                                 | 114.4                                |
| <b>C6</b>                       | 121.3                                         | 118.2  | 121.5                                         | 119.4  | 121.0                                         | 119.0                                 | 119.6                                |
| <b>C5</b>                       | 124.8                                         | 124.5  | 124.7                                         | 120.9  | 122.7                                         | 121.0                                 | 120.9                                |
| <b>C-<i>m</i></b>               | 129.8                                         | 125.5  | 129.6                                         | 125.7  | 128.4                                         | 126.2                                 | 126.2                                |
| <b>C-<i>p</i></b>               | 128.6                                         | 127.2  | 128.3                                         | 127.7  | 127.6                                         | 126.8                                 | 128.1                                |
| <b>C7</b>                       | 129.8                                         | 128.8  | 129.8                                         | 127.8  | 130.6                                         | 129.4                                 | 129.5                                |
| <b>C-<i>o</i></b>               | 136.2                                         | 134.5  | 136.0                                         | 133.8  | 135.4                                         | 133.5                                 | 134.1                                |
| <b>C9</b>                       | 138.1                                         | 136.5  | 138.5                                         | 134.9  | 138.8                                         | 138.6                                 | 138.2                                |
| <b>C-<i>i</i></b>               | 135.6                                         | 135.3  | 135.6                                         | 134.8  | 139.8                                         | 135.1                                 | 138.3                                |
| <b>C4</b>                       | 146.0                                         | 147.9  | 146.7                                         | 147.2  | 162.4                                         | 159.0                                 | 158.3                                |
| <b>C2</b>                       | 161.1                                         | 158.7  | 161.1                                         | 157.7  | 164.0                                         | 159.9                                 | 160.1                                |
| <b>C11</b>                      | 176.9                                         | 177.0  | 173.1                                         | 173.3  | 171.3                                         | 171.7                                 | 173.5                                |
| <b>MAE</b>                      | <b>2.22</b>                                   |        | <b>2.36</b>                                   |        | <b>2.19</b>                                   |                                       | <b>1.99</b>                          |
| <b>R</b>                        | <b>0.999</b>                                  |        | <b>0.999</b>                                  |        | <b>0.998</b>                                  |                                       | <b>0.999</b>                         |

**Table S10.** Crystal data and structure refinement for **Ph<sub>3</sub>SnL1** and **Ph<sub>3</sub>SnL2**.

| Empirical formula                                   | Ph <sub>3</sub> SnL1 (C <sub>31</sub> H <sub>27</sub> NO <sub>3</sub> Sn) | Ph <sub>3</sub> SnL2 (C <sub>30</sub> H <sub>25</sub> NO <sub>3</sub> Sn) |
|-----------------------------------------------------|---------------------------------------------------------------------------|---------------------------------------------------------------------------|
| Formula weight                                      | 580.22                                                                    | 566.20                                                                    |
| Temperature                                         | 100 K                                                                     | 100 K                                                                     |
| Wavelength                                          | 0.71073 Å                                                                 | 0.71073 Å                                                                 |
| Crystal system                                      | Monoclinic                                                                | Monoclinic                                                                |
| Space group                                         | <i>P2<sub>1</sub>/n</i>                                                   | <i>P2<sub>1</sub>/c</i>                                                   |
| <i>a</i>                                            | 17.6237(4) Å                                                              | 9.9429(1) Å                                                               |
| <i>b</i>                                            | 15.5051(3) Å                                                              | 13.8691(2) Å                                                              |
| <i>c</i>                                            | 19.1439(5) Å                                                              | 17.5691(3) Å                                                              |
| $\alpha, \beta, \gamma$ (°)                         | 90°, 96.914(2)°, 90°                                                      | 90°, 92.210(2)°, 90°                                                      |
| Volume                                              | 5193.2(2) Å <sup>3</sup>                                                  | 2420.96(6) Å <sup>3</sup>                                                 |
| <i>Z</i>                                            | 8                                                                         | 4                                                                         |
| Calculated density                                  | 1.484 mg/mm <sup>3</sup>                                                  | 1.553 mg/mm <sup>3</sup>                                                  |
| Absorption coefficient                              | 1.017 mm <sup>-1</sup>                                                    | 1.088 mm <sup>-1</sup>                                                    |
| <i>F</i> (000)                                      | 2352                                                                      | 1144                                                                      |
| Crystal size                                        | 0.43 × 0.38 × 0.11 mm                                                     | 0.4 × 0.4 × 0.34 mm                                                       |
| $\theta$ range for data collection                  | 3.116 to 28.958 deg.                                                      | 3.037 to 29.105 deg.                                                      |
| Limiting indices                                    | -22 ≤ <i>h</i> ≤ 23, -20 ≤ <i>k</i> ≤ 19, -24 ≤ <i>l</i> ≤ 25             | -13 ≤ <i>h</i> ≤ 13, -18 ≤ <i>k</i> ≤ 18, -22 ≤ <i>l</i> ≤ 24             |
| Reflections collected / unique                      | 71496 / 12290 [ <i>R</i> <sub>int</sub> = 0.0875]                         | 28772 / 5900 [ <i>R</i> <sub>int</sub> = 0.0335]                          |
| Completeness to $\theta = 25.242$                   | 99.8 %                                                                    | 99.8 %                                                                    |
| Absorption correction                               | Analytical                                                                | Semi-empirical from equivalents                                           |
| Max. and min. transmission                          | 0.920 and 0.714                                                           | 1.00000 and 0.96529                                                       |
| Refinement method                                   | Full-matrix least-squares on <i>F</i> <sup>2</sup>                        | Full-matrix least-squares on <i>F</i> <sup>2</sup>                        |
| Data / restraints / parameters                      | 12290 / 0 / 650                                                           | 5900 / 0 / 317                                                            |
| Goodness-of-fit on <i>F</i> <sup>2</sup>            | 1.046                                                                     | 1.027                                                                     |
| Final <i>R</i> indices [ <i>I</i> > 2σ( <i>I</i> )] | <i>R</i> <sub>1</sub> = 0.0412, <i>wR</i> <sub>2</sub> = 0.0988           | <i>R</i> <sub>1</sub> = 0.0230, <i>wR</i> <sub>2</sub> = 0.0501           |
| <i>R</i> indices (all data)                         | <i>R</i> <sub>1</sub> = 0.0533, <i>wR</i> <sub>2</sub> = 0.1119           | <i>R</i> <sub>1</sub> = 0.0296, <i>wR</i> <sub>2</sub> = 0.0531           |

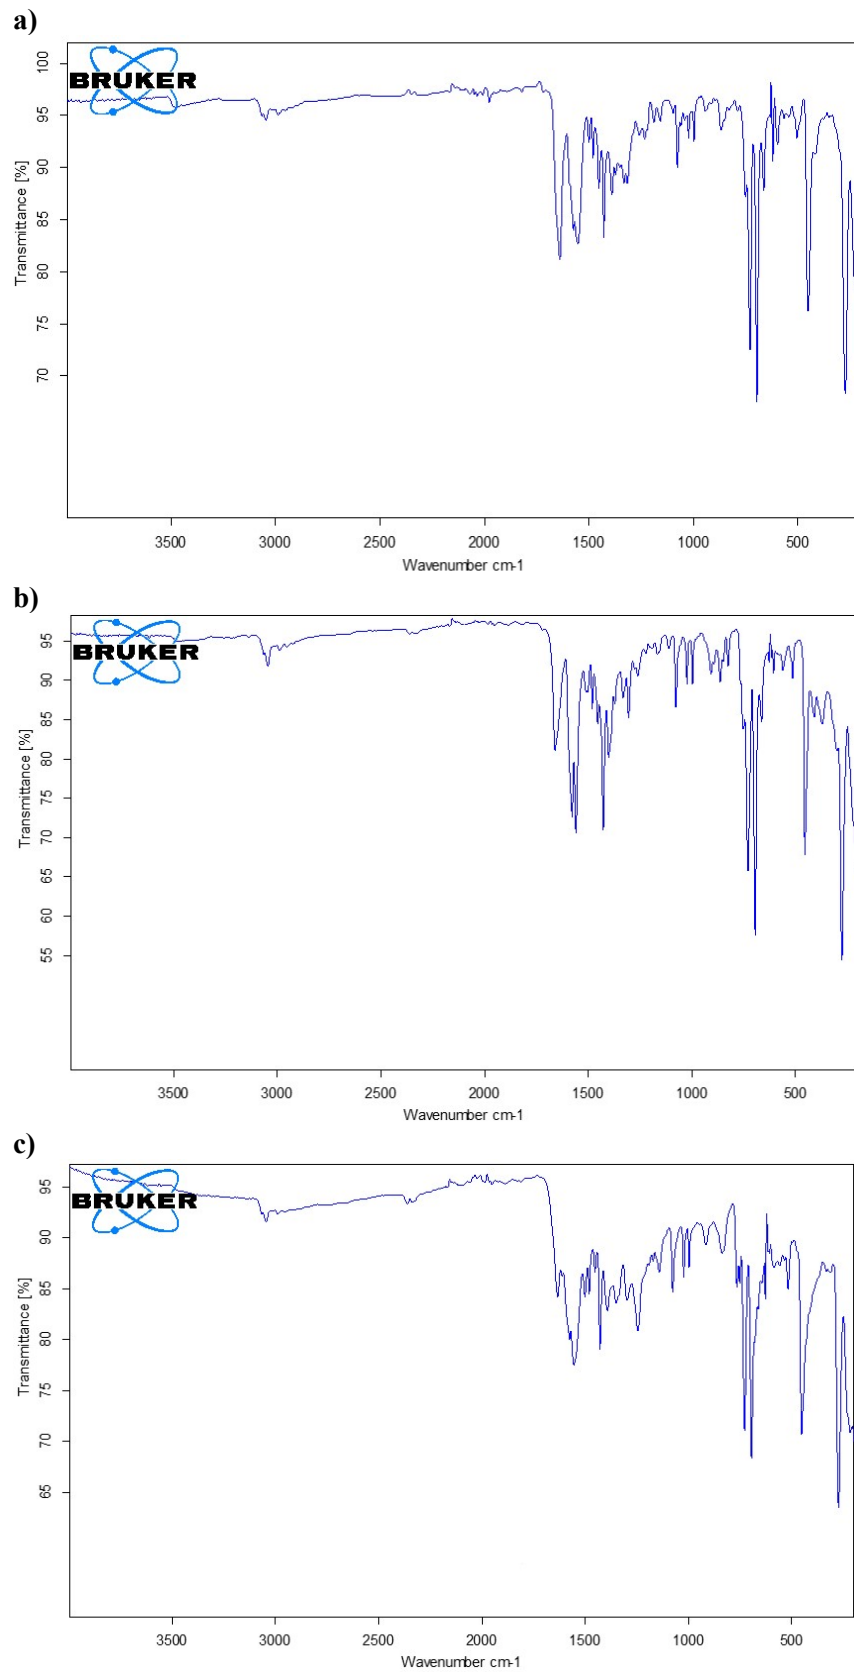

Figure S1. FT-IR spectra of the triphenyltin(IV) compounds: a)  $\text{Ph}_3\text{SnL1}$ , b)  $\text{Ph}_3\text{SnL2}$ , c)  $\text{Ph}_3\text{SnL3}$ .

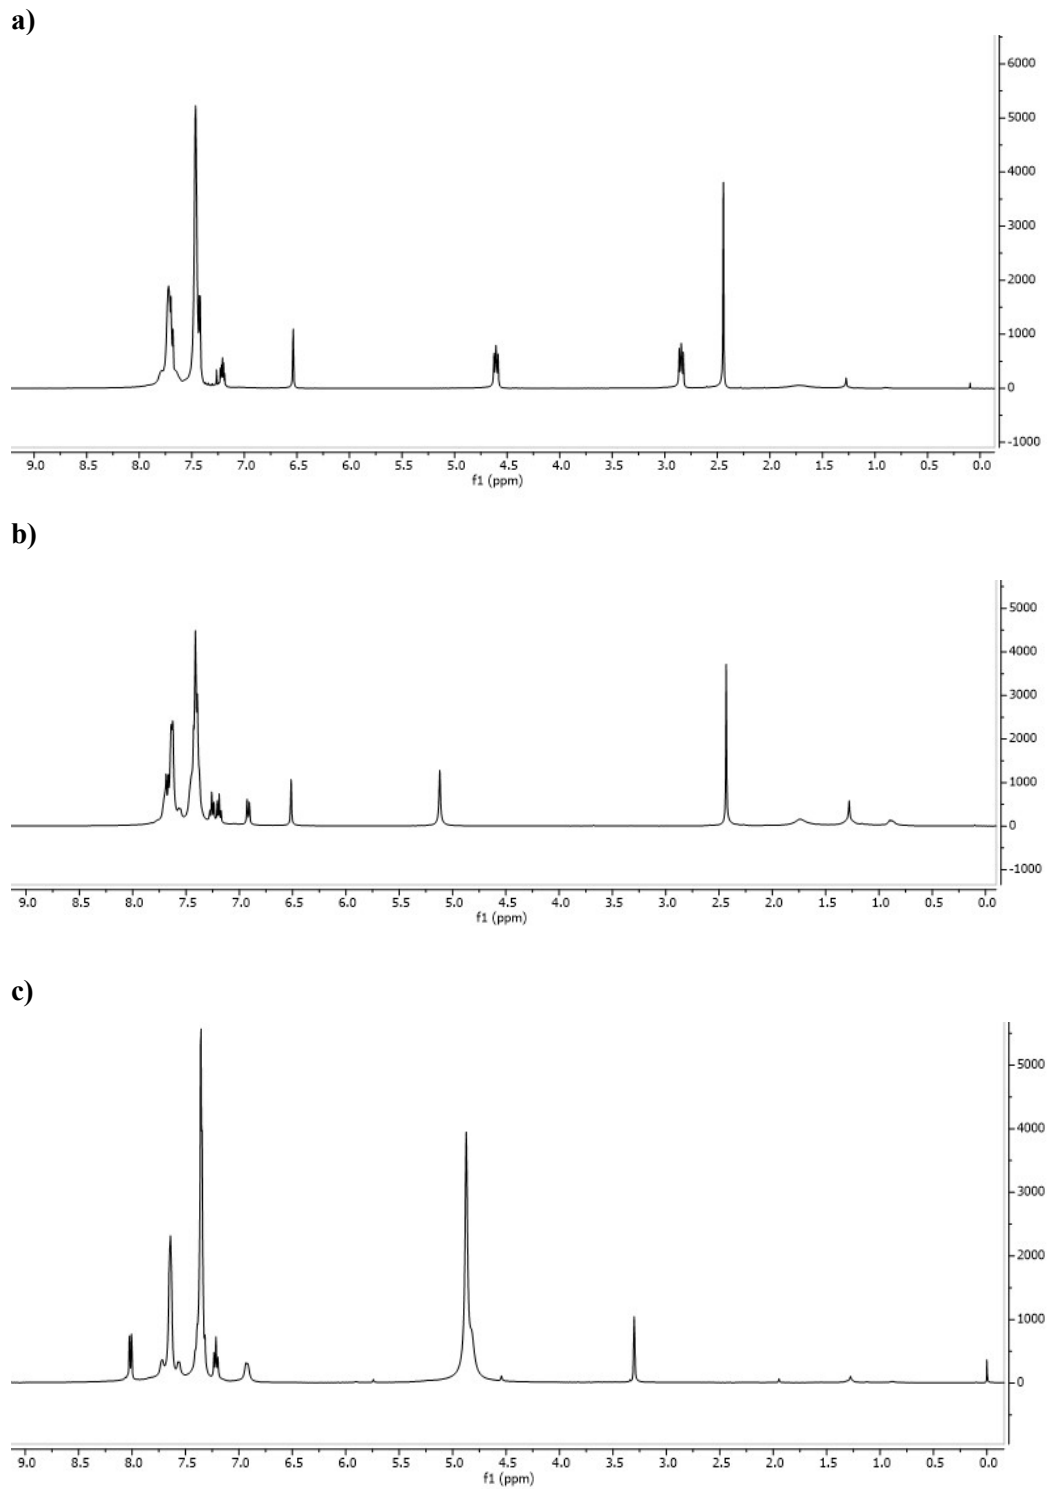

**Figure S2.** <sup>1</sup>H NMR of triphenyltin(IV) compounds: a) **Ph<sub>3</sub>SnL1**, b) **Ph<sub>3</sub>SnL2**, c) **Ph<sub>3</sub>SnL3**.

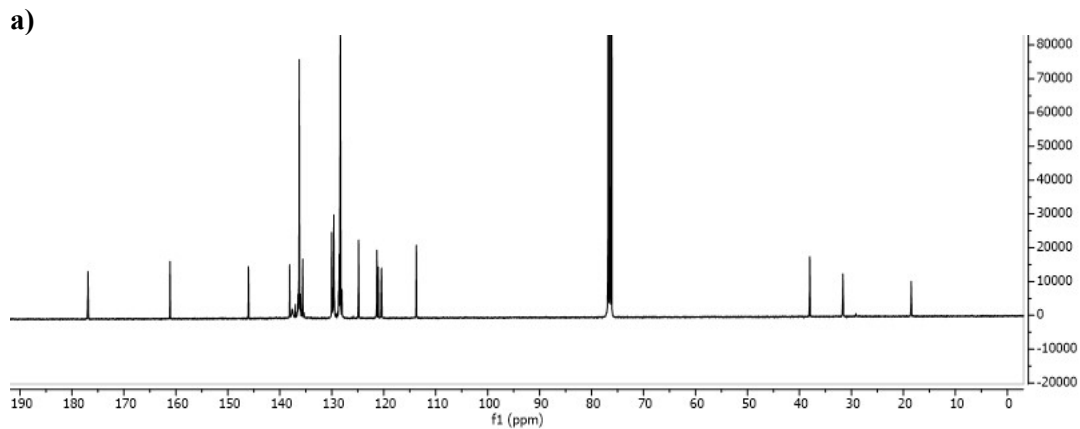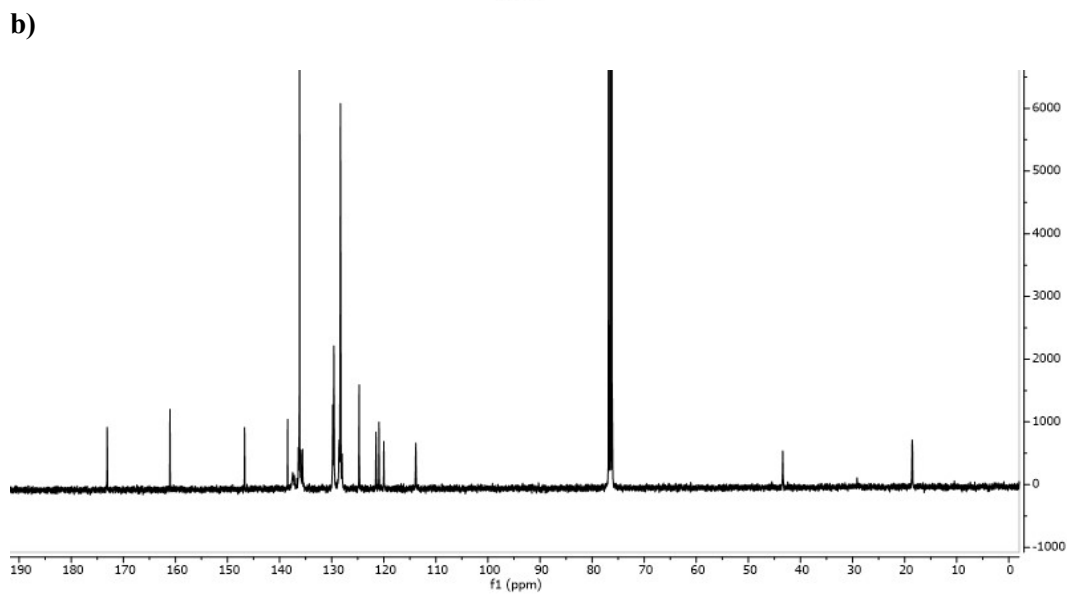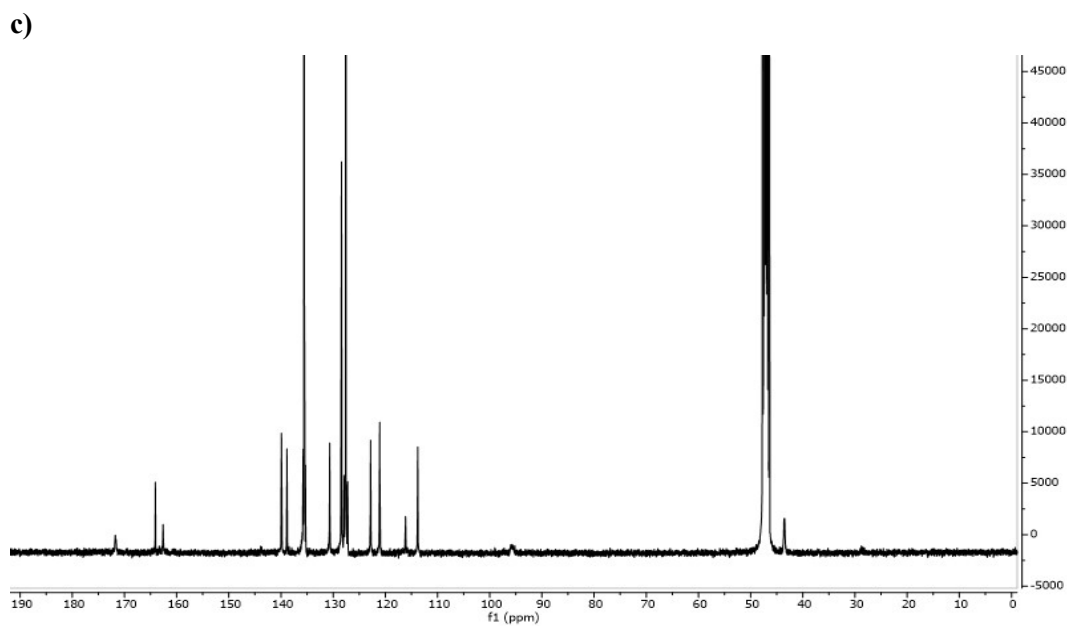

Figure S3.  $^{13}\text{C}$  NMR of triphenyltin(IV) compounds: a)  $\text{Ph}_3\text{SnL1}$ , b)  $\text{Ph}_3\text{SnL2}$ , c)  $\text{Ph}_3\text{SnL3}$ .

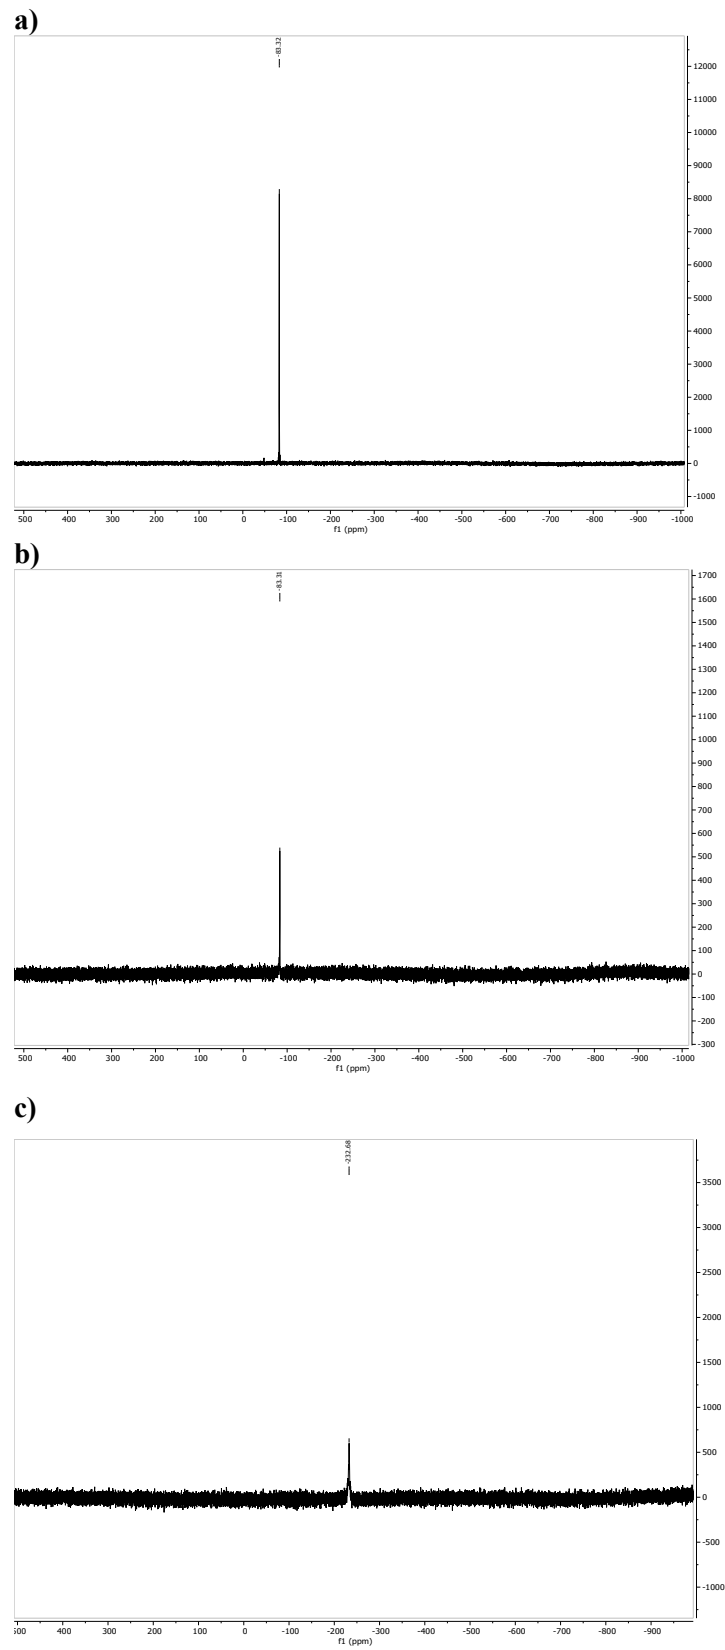

Figure S4.  $^{119}\text{Sn}$  NMR of triphenyltin(IV) compounds: a)  $\text{Ph}_3\text{SnL1}$ , b)  $\text{Ph}_3\text{SnL2}$ , c)

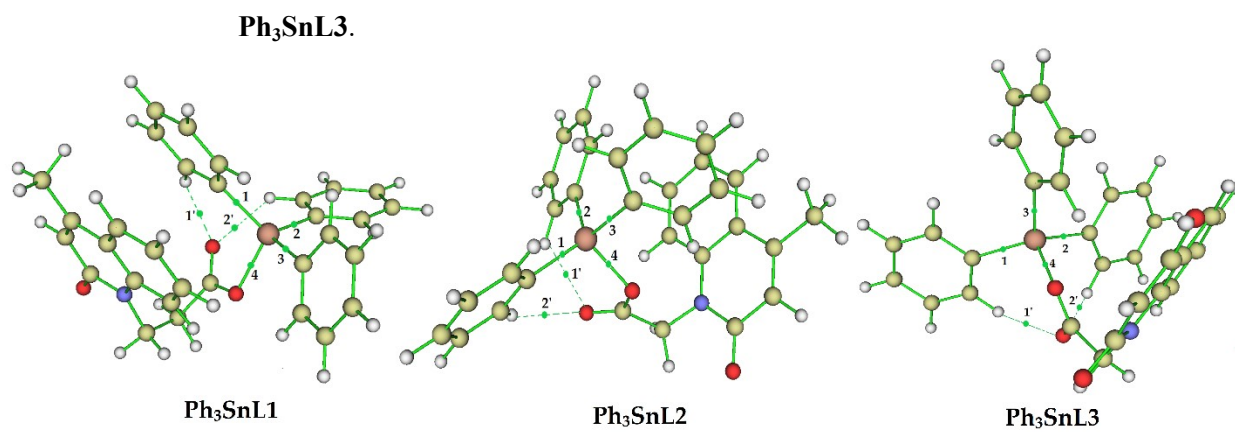

**Figure S5.** Structures of newly synthesized compounds with defined characteristics and numbered Bond Critical Points (BCP) obtained by using QTAIM analysis.

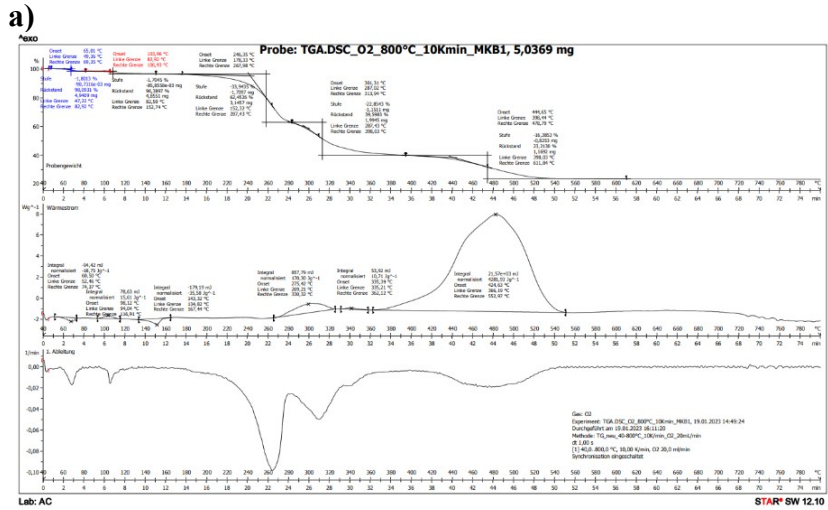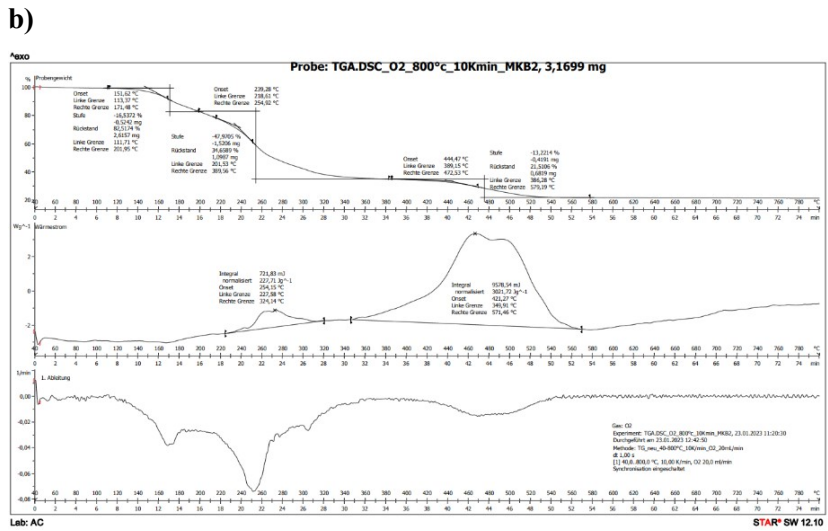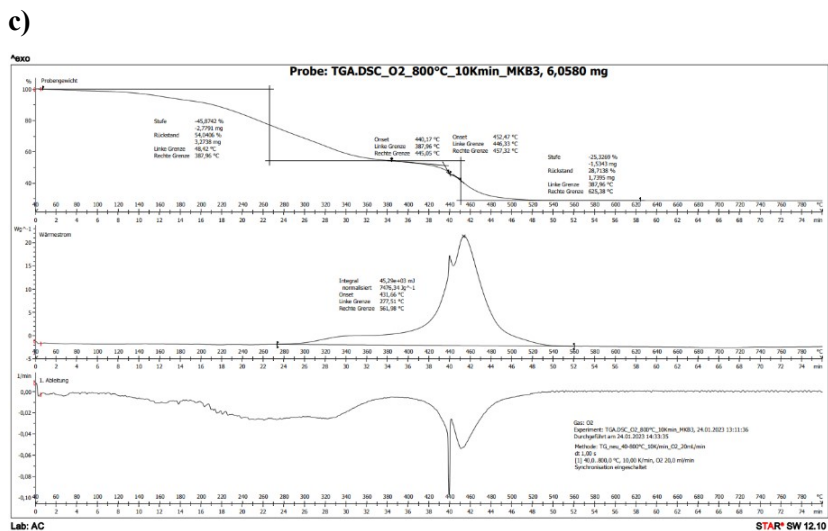

Figure S6. Thermogravimetric analyses carried out in a non-inert atmosphere ( $O_2$ ):  
 a)  $Ph_3SnL1$ , b)  $Ph_3SnL2$ , c)  $Ph_3SnL3$ .



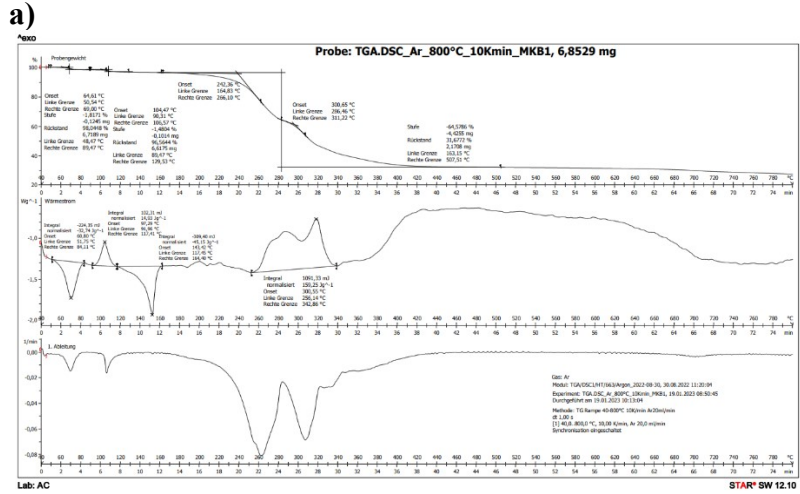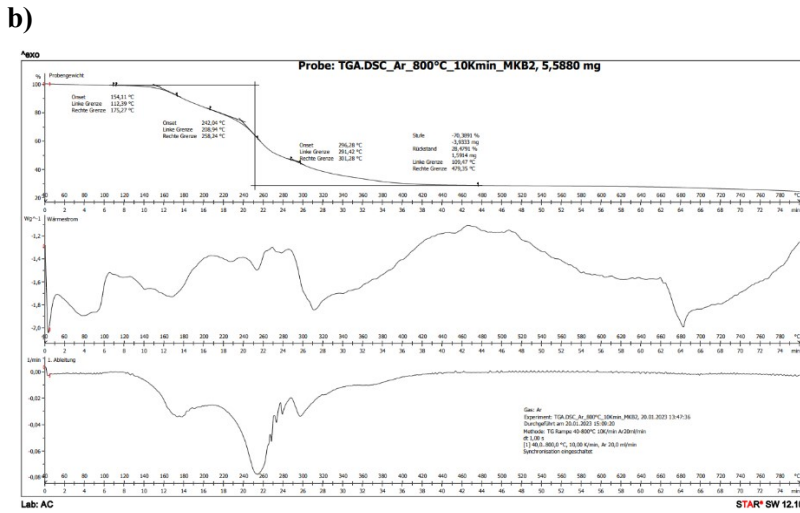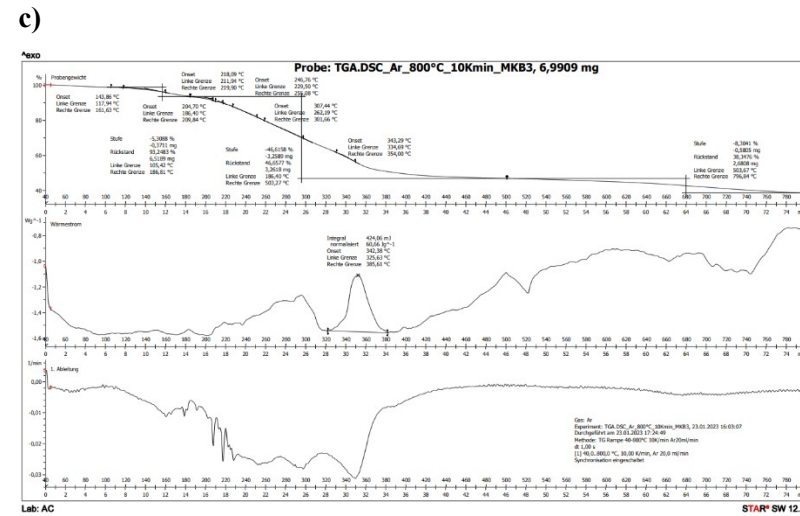

**Figure S7.** Thermogravimetric analyses carried out in an inert (Ar) atmosphere:  
 a) Ph<sub>3</sub>SnL1, b) Ph<sub>3</sub>SnL2, c) Ph<sub>3</sub>SnL3.

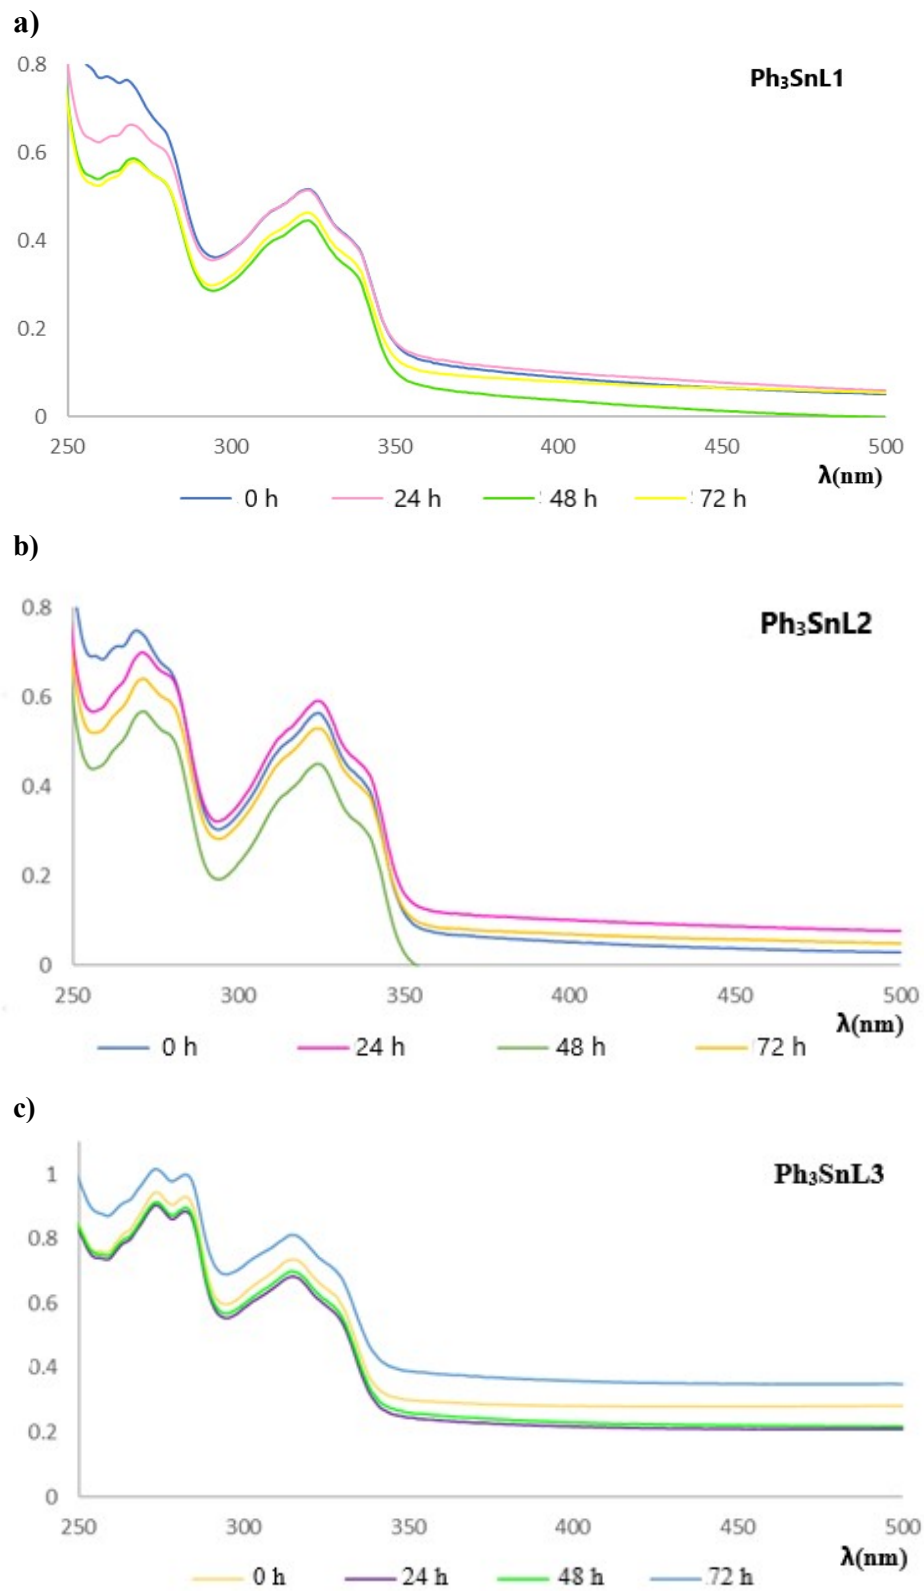

**Figure S8.** UV-Vis spectra of triphenyltin(IV) compounds in water/DMSO solution, immediately after dissolution and after 24, 48 and 72 h : a)  $\text{Ph}_3\text{SnL1}$ , b)  $\text{Ph}_3\text{SnL2}$ , c)  $\text{Ph}_3\text{SnL3}$ .

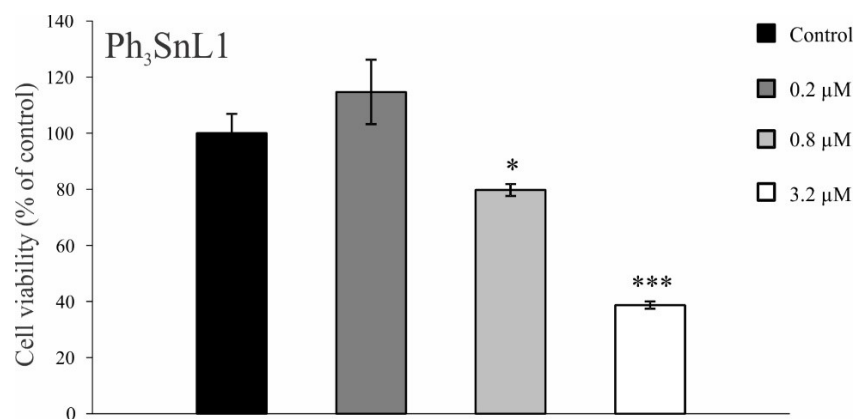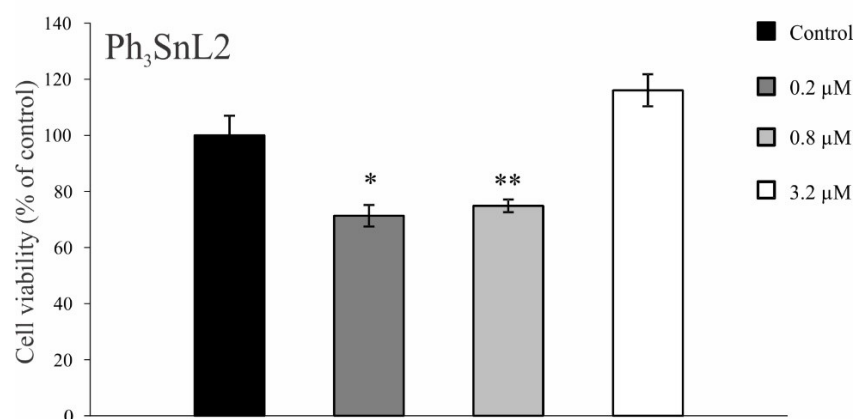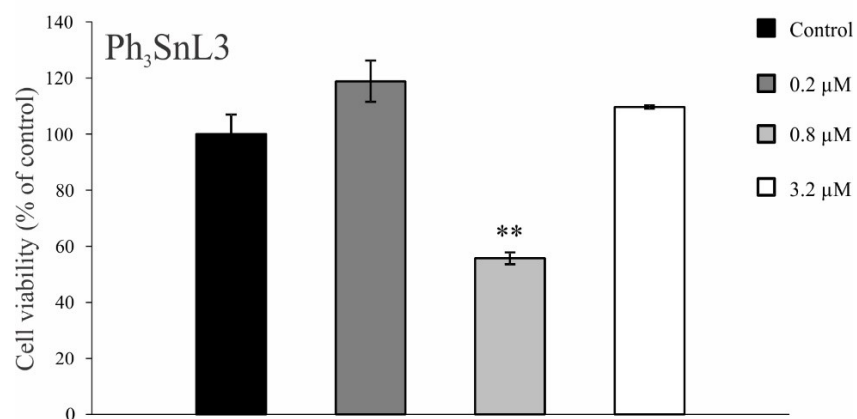

**Figure S9.** The effect of compounds **Ph<sub>3</sub>SnL1**, **Ph<sub>3</sub>SnL2** and **Ph<sub>3</sub>SnL3** on viability of peritoneal exudate cells. PEC were exposed to selected drug for 72 h and MTT and CV assays were performed. All data presented on the figure represent mean  $\pm$  SD of three independent experiments and are expressed as percentage of untreated cells (arbitrary set as 100%). \*\*  $p < 0.01$  and \*\*\*  $p < 0.001$ .

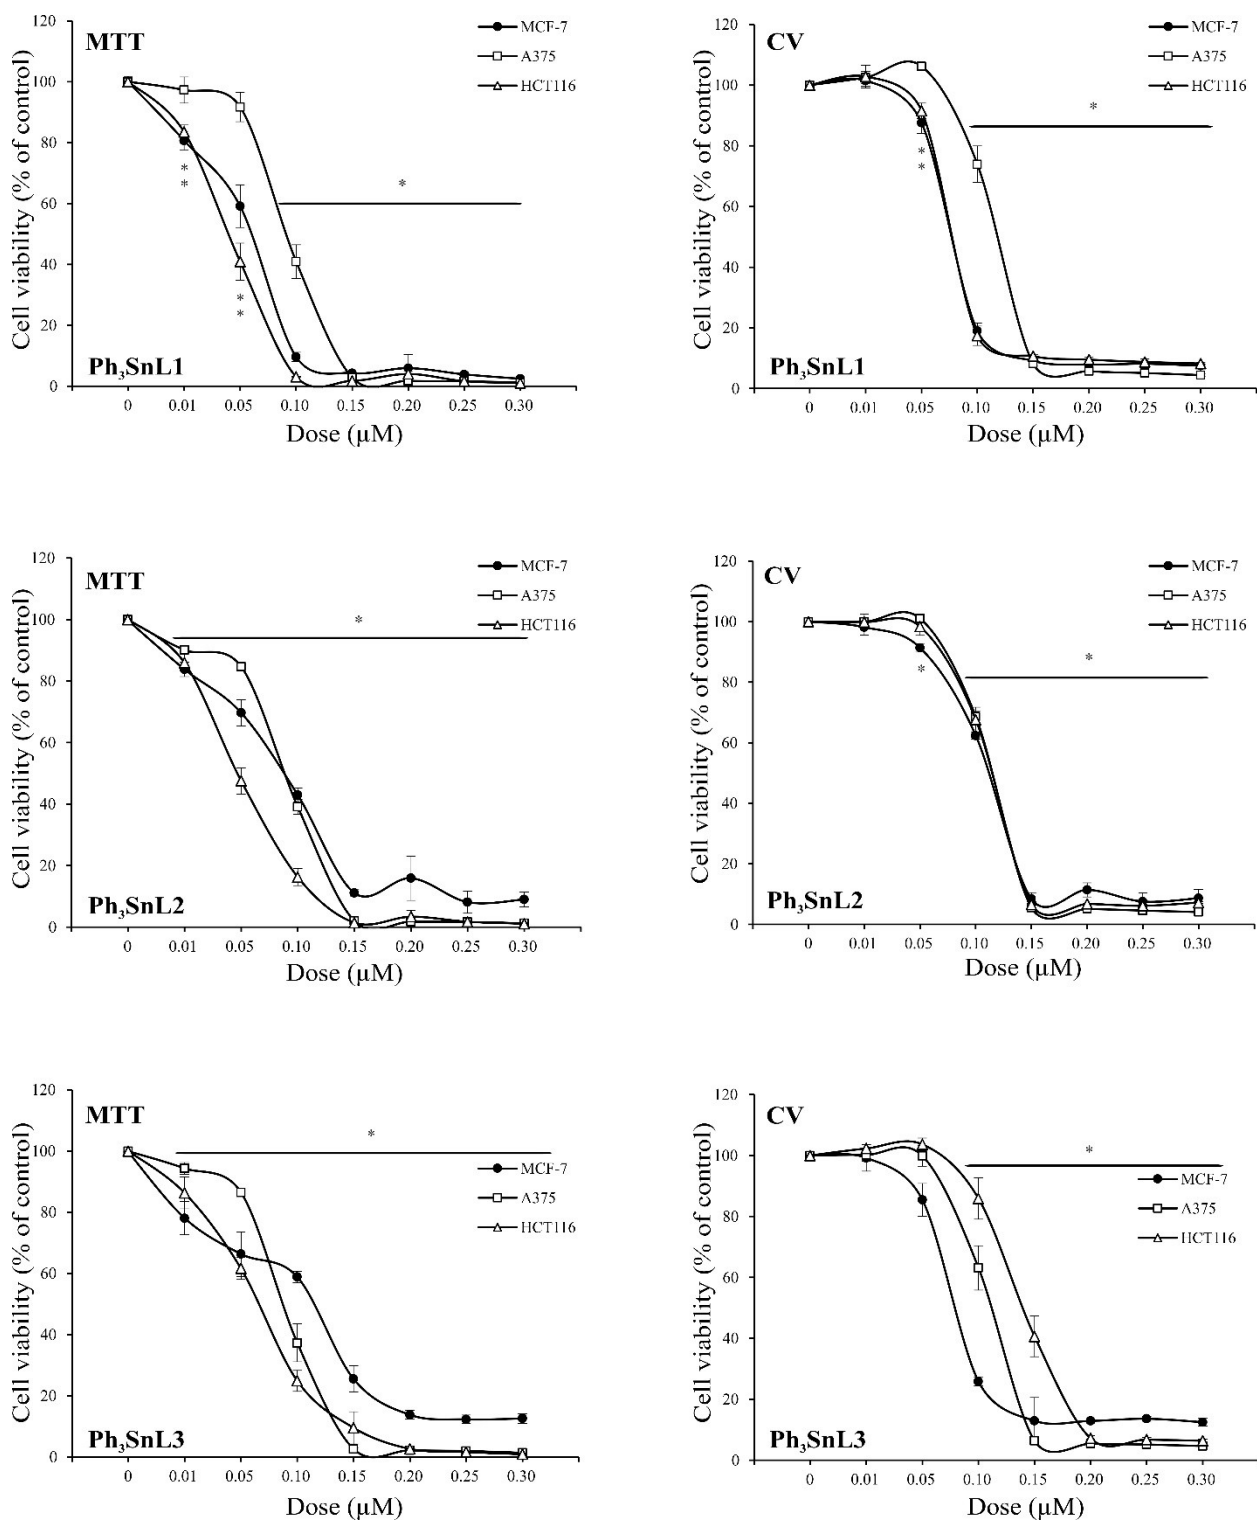

**Figure S10.** Compounds  $\text{Ph}_3\text{SnL1}$ ,  $\text{Ph}_3\text{SnL2}$  and  $\text{Ph}_3\text{SnL3}$  decreased cell viability of human cancer cell lines. Cell lines were treated with experimental compounds for 72 h and MTT and CV assays were performed. All data are expressed as mean  $\pm$  SD of one representative of three independent experiments. Statistically significant were considered  $p$  values of less than 0.05 (\*).

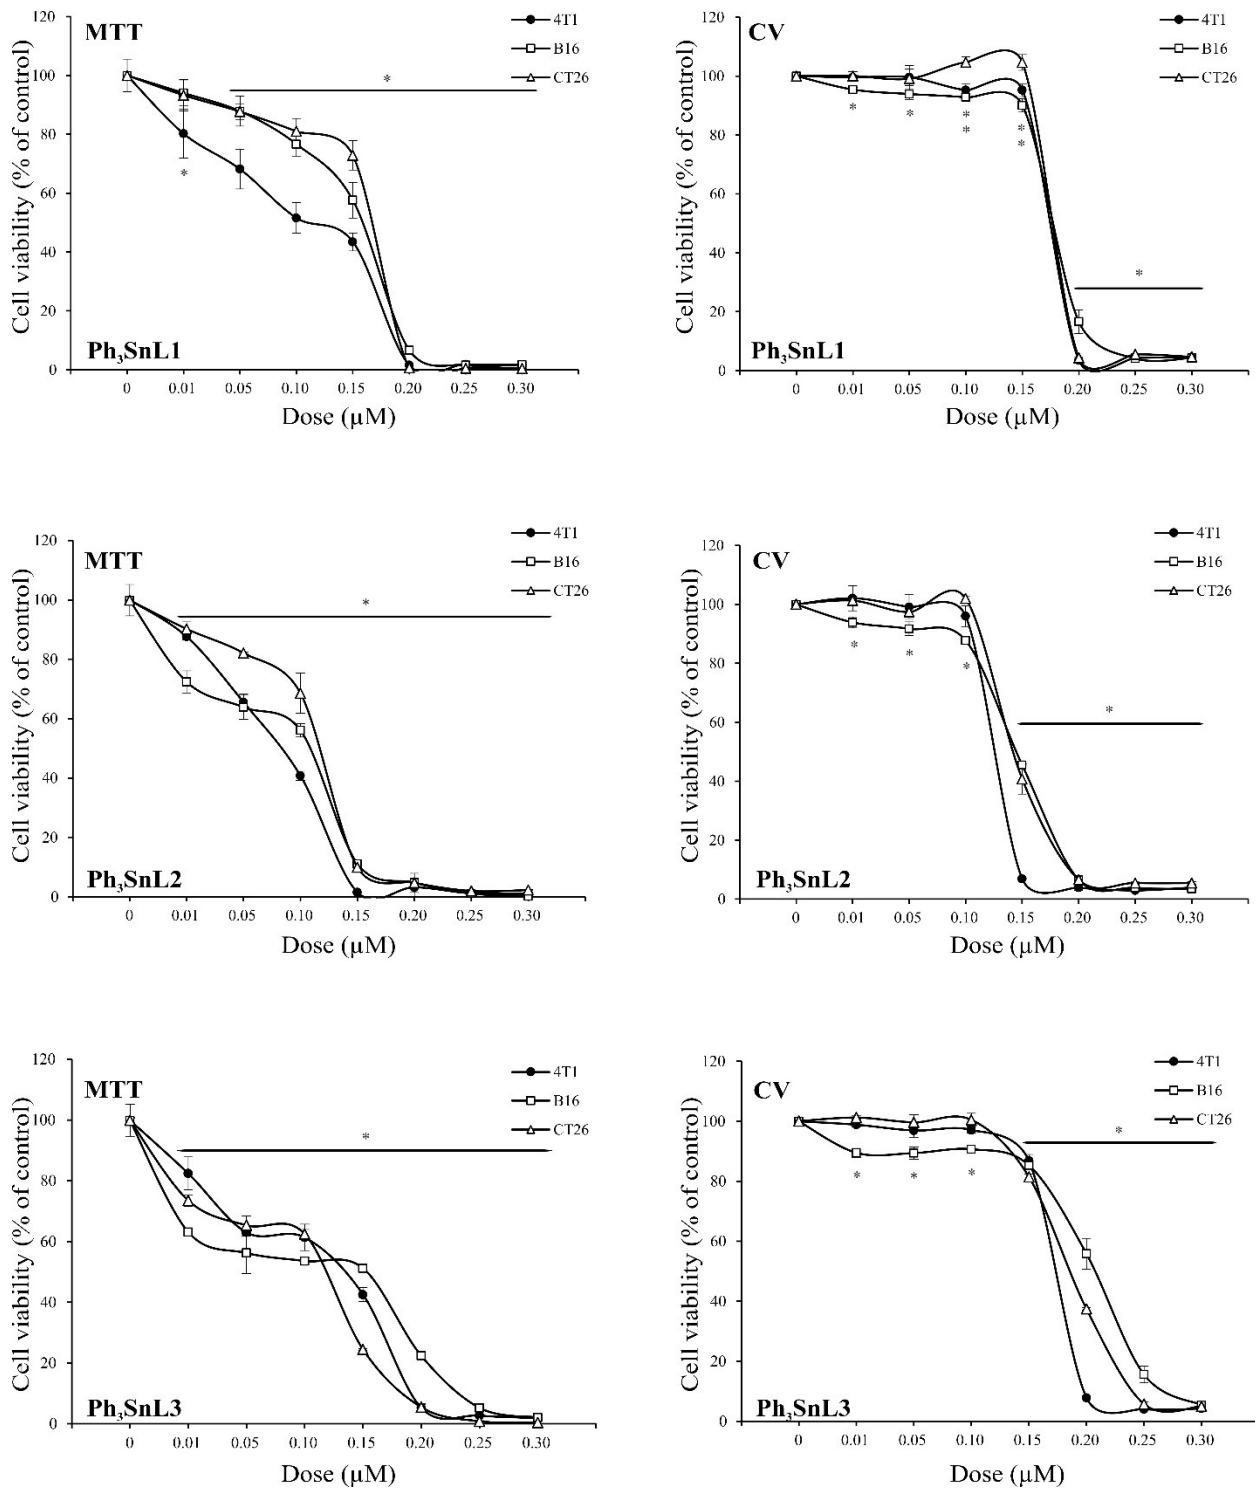

**Figure S11.** Compounds  $\text{Ph}_3\text{SnL1}$ ,  $\text{Ph}_3\text{SnL2}$  and  $\text{Ph}_3\text{SnL3}$  decreased cell viability of mouse cancer cell lines. Cell lines were treated with experimental compounds for 72 h and MTT and CV assays were performed. All data are expressed as mean  $\pm$  SD of one representative of three independent experiments. Statistically significant were considered  $p$  values of less than 0.05 (\*).

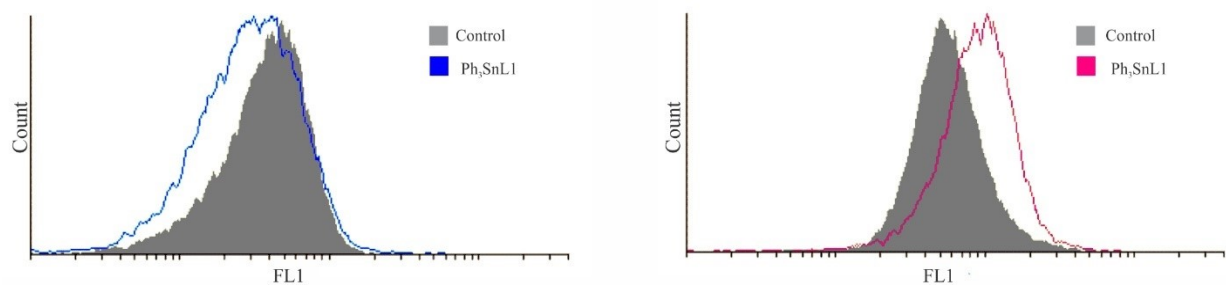

**Figure S12.** Compound **Ph<sub>3</sub>SnL1** exhibited different effects on production of ROS/RNS in A375 and B16 cells. Cells were prestained with DHR 123 staining and exposed to IC<sub>50</sub> value of compound **Ph<sub>3</sub>SnL1** for 24 h and analyzed by flow cytometry. (Left panel) A375; (Right panel) B16.
